# Supplementary material for: Microwave synthesis of size-controllable SnO2 nanocrystals for dye-sensitized solar cells
Source: Royal Society of Chemistry journal article supplement (doi:10.1039/c3nj01278f), 2013-10-29
Supplement: c3nj01278f.pdf [file c3nj01278f.pdf]

Supporting Information

## Microwave synthesis of size-controllable SnO<sub>2</sub> nanocrystals for dye-sensitized solar cells

Asdim, Kazuhiro Manseki, Takashi Sugiura and Tsukasa Yoshida\*

[\*]Prof. Tsukasa Yoshida

Department of Chemistry and Chemical Engineering, Faculty of Engineering, Yamagata University, 4-3-16 Jonan, Yonezawa, Yamagata 992-8510, Japan. E-mail: yoshidat@yz.yamagata-u.ac.jp

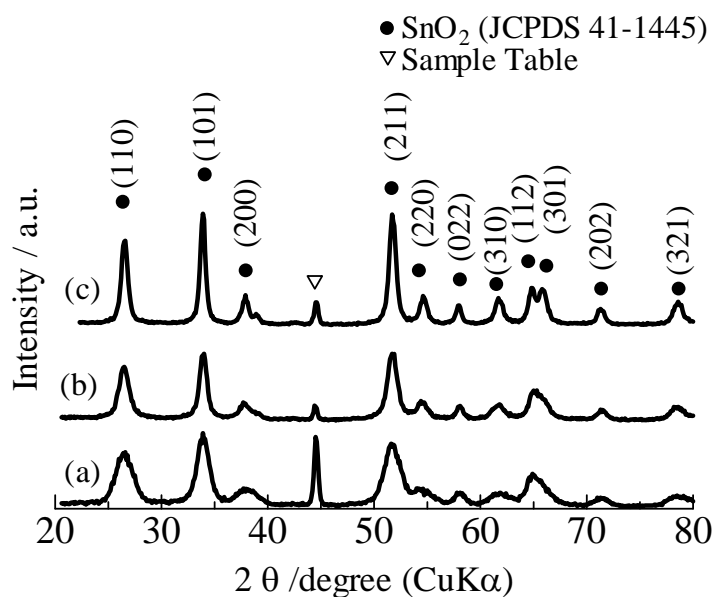

**Figure S1** XRD pattern of SnO<sub>2</sub> crystals prepared by a microwave-assisted hydrothermal method at 180°C for 45 min with different concentration of SnCl<sub>4</sub>, (a) 0.05 M, (b) 0.10 M, and (c) 0.50 M. The reaction solvent is ethanol-water ratio of 10:1 (v/v).

**Table S1** Crystallite sizes of as-synthesized SnO<sub>2</sub> nanoparticles and synthesis conditions in the different concentration of SnCl<sub>4</sub> with ethanol-water ratio of 10:1 (v/v).

| Sample | Concentration of SnCl <sub>4</sub> / M | Crystallite Size/ nm |
|--------|----------------------------------------|----------------------|
| a      | 0.05                                   | 12                   |
| b      | 0.10                                   | 19                   |
| c      | 0.50                                   | 27                   |

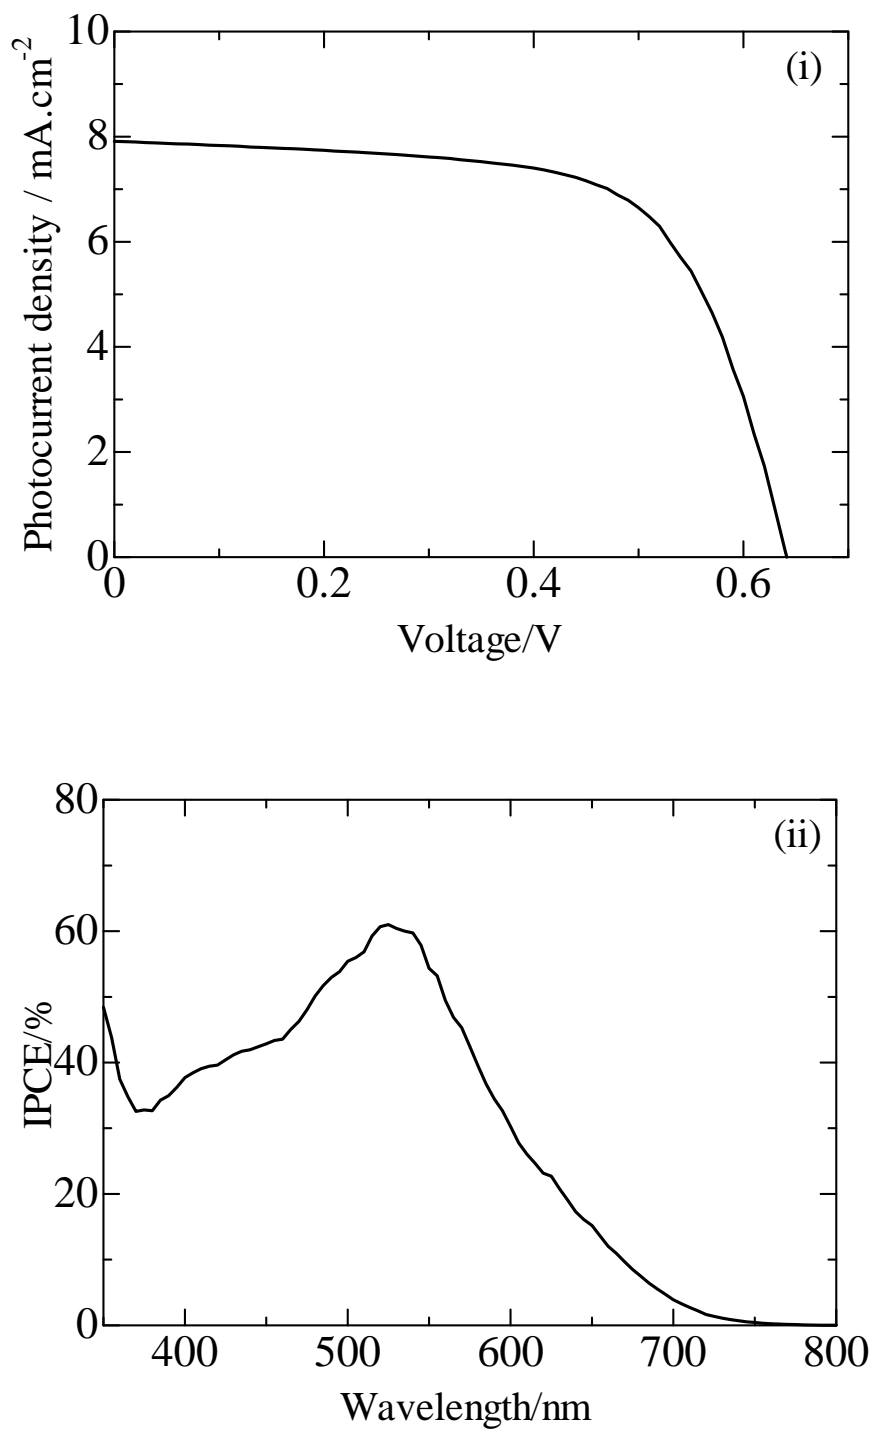

**Figure S2** Current-voltage characteristics (i) and IPCE spectrum (ii) of dye-sensitized TiO<sub>2</sub> solar cells with N719 dyes. The dye loading time was 18 h at room temperature.

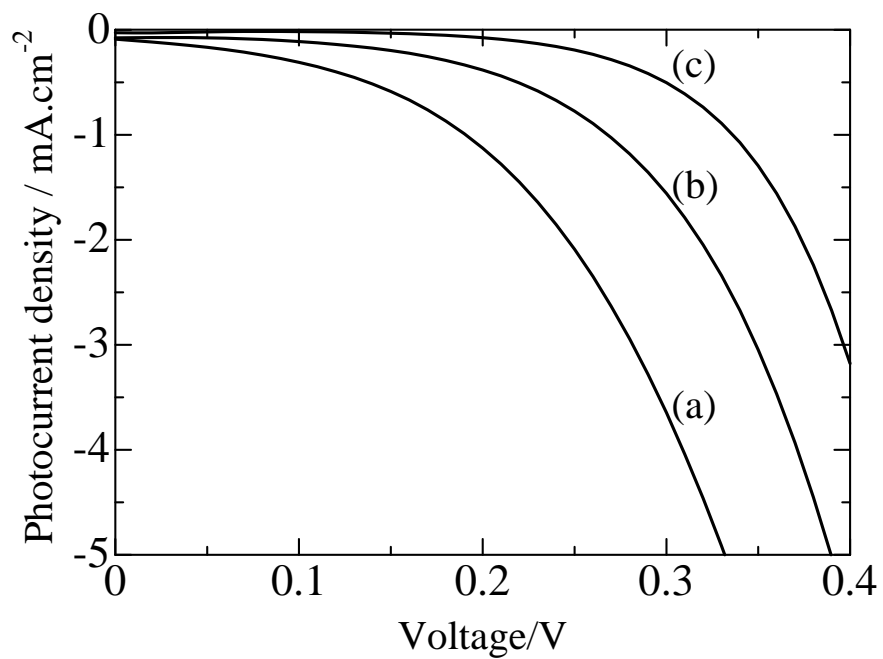

**Figure S3** Current-voltage curves of DSSCs based on SnO<sub>2</sub> photoelectrode films under dark conditions. DSSCs of SnO<sub>2</sub> nanocrystals with (a) 11 nm, (b) 18 nm, and (c) 26 nm in size are presented.
